# Supplementary material
Source: publisher site journal article supplement (https://www.dovepress.com/article/505038)
Supplement: Supplementary file 1 [file get_supplementary_file.php]

**Table S1: Outcome of patients with delirium in relation to the admission time.**

| Outcome | Addimision≤24 Hours (n=33) | Addimision>24 Hours (n=41) | *P*-value |
| --- | --- | --- | --- |
| Discharge NIHSS score | 6.00 [3.50, 13.00] | 6.00 [2.00, 9.00] | 0.366 |
| Discharge mRS score | 4.00 [3.00, 4.00] | 3.00 [2.00, 4.00] | 0.315 |
| Adverse prognosis at discharge(mRS>2), n (%) | 26 (78.8) | 28 (68.3) | 0.455 |
| 3-month mRS score at discharge | 3.00 [1.00, 5.00] | 3.00 [1.00, 4.00] | 0.401 |
| 3-month outcome (mRS > 1), n (%) | 24 (72.7) | 28 (68.3) | 0.874 |
| 3-month outcome (mRS > 2), n (%) | 20 (60.6) | 23 (56.1) | 0.878 |
| 3-month outcome (mRS > 3), n (%) | 14 (42.4) | 18 (43.9) | 1 |
| 3-month mortality, n (%) | 2 (6.1) | 2 (4.9) | 1 |

Notes: Comparing the 3-month prognosis of patients with delirium occurring ≤24 hours after admission and >24 hours after admission.

Abbreviations: NIHSS, National insti_x0002_tutes of health stroke scale; mRS, Modified rankin scale.

**Table S2: Prognosis of each subtype of delirium.**

| Outcome | Hyperactive (n=41) | Hypoactive (n=17) | Mixed (n=16) | *P*-value |
| --- | --- | --- | --- | --- |
| Discharge NIHSS score | 6.00 [4.00, 9.00] | 7.50 [2.50, 17.00] | 5.50 [3.00, 12.00] | 0.677 |
| Discharge mRS score | 4.00 [3.00, 4.00] | 4.00 [3.00, 4.00] | 3.50 [2.00, 4.00] | 0.727 |
| Adverse prognosis at discharge(mRS>2), n(%) | 31 (75.6) | 13 (76.5) | 10 (62.5) | 0.566 |
| 3-month mRS score at discharge | 3.00 [1.00, 4.00] | 4.00 [1.00, 5.00] | 3.00 [1.75, 5.00] | 0.187 |
| 3-month outcome (mRS > 1), n (%) | 28 (68.3) | 12 (70.6) | 12 (75.0) | 0.883 |
| 3-month outcome (mRS > 2), n (%) | 22 (53.7) | 12 (70.6) | 9 (56.2) | 0.486 |
| 3-month outcome (mRS > 3), n (%) | 14 (34.1) | 11 (64.7) | 7 (43.8) | 0.102 |
| 3-month mortality, n (%) | 1 (2.4) | 2 (11.8) | 1 (6.2) | 0.355 |

Notes: Comparing the 3-month prognosis of patients with different subtypes of delirium.

Abbreviations: NIHSS, National insti_x0002_tutes of health stroke scale; mRS, Modified rankin scale.
